37 infectious cysts from contaminated water<sup>3</sup> or interpersonal contact<sup>4</sup>. Following passage of cysts  
38 through the acidic environment of stomach, they excyst in the duodenum and rapidly colonize  
39 the small intestine<sup>5</sup>. In the small intestine, cell density, lipid starvation and alkaline pH trigger a  
40 portion of trophozoites to initiate encystation<sup>6-9</sup>. During the early phase of *Giardia* encystation,  
41 major morphological changes occur that include cytoskeleton rearrangement, biogenesis of the  
42 Golgi-like ESVs, and cell cycle arrest<sup>6,7,10</sup>.

43 Cell cycle arrest appears to be a common theme in encystation. Studies in *Giardia lamblia*<sup>11</sup>,  
44 *Acanthamoeba*<sup>12</sup>, and *Entamoeba invadens*<sup>13</sup> have all shown that encystation stimulus causes  
45 the accumulation of G2/M cells in the early stage of encystation. In *Acanthamoeba*, encystation  
46 frequency correlates with the proportion of cells arrested at G2<sup>12</sup>, suggesting that  
47 differentiation is initiated from G2/M cells. These observations led to a hypothesis that a  
48 restriction point in *Giardia's* cell cycle also limits encystation to cells in G2/M<sup>11,14</sup>. However, the  
49 molecular mechanism underlying this restriction point regulating entry into the encystation  
50 program is totally unknown.

51 Pioneer transcription factors (TFs), which are capable of binding condensed chromatin, possess  
52 the incredible ability to reprogram cell differentiation<sup>15</sup>. Several studied TFs in *Giardia*, such as  
53 GARP1<sup>16</sup>, E2F1<sup>17</sup>, WRKY<sup>18</sup>, PAX2<sup>19,20</sup>, ARID1<sup>21</sup> have been shown to be upregulated at 24 h post  
54 induction of encystation. A recent study has shown that a MYB TF is a master regulator of  
55 differentiation in *Toxoplasma*<sup>22</sup>. MYB TFs also modulate encystation in *Giardia*<sup>23</sup> and  
56 *Entamoeba*<sup>24</sup>. Proteomic and RNA sequencing studies agree that *Giardia's* MYB2 TF is a key  
57 regulator of encystation<sup>25-27</sup>. While these observations hint that MYB2 may prompt the  
58 initiation of encystation, the upstream regulators of MYB2 are still poorly understood. Here, we  
59 screened *Giardia* transcription factors that were reported to be upregulated within 1.5-4 h of  
60 inducing encystation based on published RNAseq data<sup>27</sup>. A functional role in encystation was  
61 tested using an established dead Cas9 based CRISRPi system and a newly generated CasRX  
62 knockdown system that targets RNA for degradation. We identified GARP4 as an upstream  
63 regulator of MYB2 and determined that it has a key role in regulating entry into the encystation  
64 program.

65

## 66 **Results**

### 67 **Characteristics of transcription factors during early encystation in *Giardia***

68 Given that CWP1-3 are important encystation indicators in *Giardia*<sup>6,7,25,28,29</sup>, we first  
69 investigated CWP1-3 protein levels during the initiation of encystation using NanoLuc based  
70 expression reporters<sup>30,31</sup>. After exposure to encystation medium, CWP1-3 protein levels began  
71 to increase after 1.5h and rose exponentially by 4h (Fig 1a). To date, several TFs have been  
72 identified with roles in regulating CWP1-2, these include MYB2<sup>23</sup>, E2F1<sup>17</sup>, PAX1,2<sup>19,20</sup>, ARID1<sup>21</sup>  
73 and WRKY<sup>18</sup>. Whether these TFs have a role in initiating entry into the encystation pathway has  
74 not been established. The increase of CWPs is likely to be signaled through early response TFs,

75 which trigger the activation or repression of encystation specific genes. A previous  
76 transcriptomics study identified 11 TF candidates that are upregulated within 4 h of encystation  
77 <sup>27</sup>. We sought to test whether these TFs function as upstream regulators of encystation. Due to  
78 low confidence that some of the identified proteins were in fact transcription regulators, we  
79 endogenously tagged the C-terminus of these 11 proteins with mNeonGreen (mNG) to verify  
80 nuclear localization, using MYB2 as a positive control. MYB2 expression has been detected 7 h  
81 post induction of encystation in proteomic<sup>25</sup> and RNA sequencing studies<sup>27</sup> and its function in  
82 encystation has been established. We were able to detect nuclear localization of MYB2 at 4 h  
83 but not at 0 and 1.5 h (Fig 1b). In contrast, we observed six TFs, including MYB1, GARP4, PAX1,  
84 ARID2, E2F1 with nuclear localization at 0 h but with noticeable increases in their levels after  
85 1.5 h of encystation stimulus (Fig 1c; Extended data 1).

86 We then decided to investigate the expression level of these TFs. GARP4 and MYB1 rose nearly  
87 four folds after 1.5 h of inducing encystation, with GARP4 having the highest level of induction  
88 (Fig 1d). The expressions of PAX1, ARID2 and E2F1 only modestly increased by 4h (Extended  
89 data 2). That MYB1 and GARP4 are upregulated before MYB2 hints that these transcription  
90 factors may be early regulators of encystation that are upstream of MYB2 and CWP1.

91

## 92 **Depletion of MYB2, MYB1, and GARP4 alters the encystation response**

93 We next screened for encystation-specific TFs that are required for CWP1 synthesis, focusing on  
94 genes that were upregulated within 1.5 h of encystation. To screen for encystation specific TFs,  
95 we used an established dCas9 based CRISPRi system <sup>28</sup> and generated a complementary Cas13  
96 knockdown system. Cas13 enzymes are RNA-targeting CRISPR enzymes which have been shown  
97 to have high efficiency and specificity in human cells<sup>32</sup>. We first tested the ability to express  
98 three Cas13 enzymes (Extended data 3a), including PsCas13b<sup>33</sup>, CasRX<sup>32</sup> and EsCas13d<sup>32</sup>. CasRX  
99 was the only Cas13 enzyme with good expression in *Giardia* (Extended data 3b). Starting with  
100 the existing CRISPRi vector, we replaced dCas9 and the gRNA scaffold sequence (SCF) with  
101 CasRX and the CasRX-specific direct repeat (DR) (Extended data 3c), to establish a functional  
102 CasRX knockdown system. To determine if one of these knockdown systems might be better  
103 tolerated than the other, we examined the proportion of cells that expressed dCas9 or CasRX  
104 and found no appreciable difference (Extended data 3d,e). Moreover, the growth rate was  
105 essentially identical for dCas9 and CasRX expressing cell lines (Extended data 3f). To compare  
106 efficacy of knockdown, we designed CasRX- and CRISPRi-specific guide RNAs to deplete  
107 NanoLuc and CWP1. For these two genes CasRX outperformed CRISPRi reaching up to 80%  
108 reduction for CWP1 (Extended data 4). However, screening of gRNAs against the set of six TFs  
109 of interest revealed that efficacy varies by target gene and neither system is consistently better  
110 than the other.

111 As previous studies have suggested a critical role for MYB2 in *Giardia* encystation<sup>23,34</sup>, we first  
112 investigated the phenotype of a CRISPRi-mediated MYB2 knockdown mutant (Fig 2a). Depletion

113 of MYB2 reduced the CWP1 and CWP2 level at 4h of encystation (Fig 2b,c, Extended data 5a)  
114 and totally abolished the maturation of cysts (Fig 2d; Extended data 6), suggesting MYB2 is  
115 essential for encystation. Notably, our data is consistent with a MYB2 antisense silencing  
116 mutant which reduces CWP1 expression<sup>23</sup>. Knockdown of MYB1 resulted in lower CWP1 and  
117 CWP2 levels (Fig 2e; Extended data 5a) and fewer encysting cell (Fig 2f,g); however after 48h  
118 the percentage of viable mature cysts (Fig 2h; Extended data 6c,d) was similar to the control.  
119 This suggests that MYB1 might be an upstream regulator of CWP1 but is not essential for cyst  
120 maturation. Interestingly, depletion of GARP4 results in a two-fold increase in CWP1 levels (Fig  
121 2i) and an approximately 20% increase in CWP2 levels (Fig 2 j-k; Extended data 5a). Notably,  
122 GARP4 knockdown results in more mature cysts (Fig 2l) without changing cyst viability  
123 (Extended data 6a,b). We additionally determined that knockdown of E2F1 (Extended data 7a-  
124 c) and PAX1 (Extended data 7d-f) produced less CWP1 which agrees with published studies<sup>17,20</sup>.  
125 However, we unexpectedly found that, based on CWP1 expression, a higher proportion of the  
126 knockdown cell lines initiated the encystation pathway by 4h (Extended data 5c-d). Knockdown  
127 of ARID2 did not alter CWP1 levels (Extended data 7g-i) nor change the amount of encysting  
128 cells (Extended data 5d). In summary, these results show that GARP4 is a repressor of CWP1  
129 and cyst development and that while MYB1 is an activator of CWP1, it is not essential for cyst  
130 maturation.

131

### 132 **Depletion of GARP4 upregulates encystation**

133 To further characterize the role of GARP4, we investigated whether depletion of GARP4  
134 changes cell growth rate and cell viability. Knockdown of GARP4 does not alter proliferation or  
135 viability (Extended data 8a-b). In addition to the high bile Uppsala encystation method used  
136 above, *Giardia* can be encysted with additional methods that include the two-step method that  
137 removes bile and then provides bile levels moderately above the critical concentration for bile  
138 acid micelle formation to sequester cholesterol or cells can be starved for cholesterol with lipo-  
139 protein deficient media. Similar to the high bile Uppsala method, both two-step and lipo-  
140 protein deficient encystation media upregulated CWP1 more in the GARP4 mutant background  
141 (Extended data 8d), indicating GARP4 knockdown phenotype is not restricted to a specific  
142 encystation protocol. Considering that GARP4 has an important role in regulating encystation,  
143 we examined how its levels change over a fine time course at the induction of encystation.  
144 Remarkably, GARP4 levels shoot up at 30 minutes while MYB1 does not appreciably ramp up  
145 until after 60 minutes of encystation (Fig 3a). GARP4 mutants have consistently higher CWP1  
146 levels during early encystation (Fig 3b). We analyzed individual cells to determine whether the  
147 increase of CWP1 in the GARP4 knockdown lines was due to increased numbers of cells  
148 entering the encystation program or resulted from increased levels of CWP1 per cell. We  
149 collected encysting cells from different time points of encystation and stained with a CWP1  
150 antibody to quantify encysting cells. We then investigated various phenotypes of CWP1  
151 trafficking in GARP4 mutants. The percentage of encysting cells is 1.5-2 fold higher in GARP4

152 mutants at 0, 1, 2, 4, 24 h treatments (Extended data 9; Fig 3c-d). Furthermore, we analyzed  
153 CWP1-positive vesicle size and volume to address if CWP1 trafficking in GARP4 mutant is  
154 altered. Our results show that neither vesicle size nor vesicle volume are changed (Fig 3e-f;  
155 Extended data 8c). Consistently, overexpression of GARP4 inhibits 50% of CWP1 expression  
156 (Extended data 8e,f). These findings suggest that the main role of GARP4 is to modulate the  
157 portion of cells that enter the differentiation pathway.

158 Given that cysts initiate new infections and a depletion of GARP4 leads to a higher rate of  
159 encystation, mutations that reduce GARP4 would appear to be selectively beneficial. However,  
160 the situation is more complicated because any trophozoite that forms a cyst will not produce  
161 descendant trophozoites that collectively could give rise to multiple cysts. Thus, if there is  
162 population of *Giardia* expanding inside an infected host, there is a tradeoff between current and  
163 future cyst production.

164 This tradeoff between short-term and long-term production can be captured by a simple  
165 dynamical model (see Methods). In brief, we assume that the population of trophozoites expands  
166 at a constant rate within the host and is shed at a constant rate from the host. In our model,  
167 trophozoites inside the host encyst at a constant rate (and cysts do not divide). We derive an  
168 expression giving the cumulative number of cysts as a function of the length of infection (as well  
169 as the initial number of cells and the rates of growth, shedding and encystation; see Methods).  
170 Using this expression, we determine the optimal encystation rate as a function of the other model  
171 parameters (Fig 3g). This optimal encystation rate decreases with an increasing period of  
172 infection, an increasing growth rate inside the host, and a decreasing rate of loss due to shedding.  
173 All else being equal, factors that make infections longer, more productive, or less prone to  
174 shedding are predicted to favor a longer term investment in cyst production via a *smaller*  
175 encystation rate.

176 One of the principal results from this model can be tested experimentally. Specifically, under a  
177 serial propagation scheme (see Methods), we predict that the GARP4 knockdown lines will  
178 exhibit higher cyst production in early transfers, but lower cyst production in late transfers,  
179 relative to wild type. This is indeed the pattern that we see (Fig 3h). Furthermore, we see that  
180 the long-term cost of a higher encystation rate is a relative decrease in the trophozoite  
181 population (Fig 3i).

182

### 183 **GARP4 functions in the G1/S phase of the cell cycle**

184 Encystation-induced G2 arrest has been demonstrated in *Giardia*<sup>35,36</sup>. Indeed, our data is  
185 consistent with previous studies that 1.5 h of encystation is sufficient to cause accumulation of  
186 G2/M cells with a corresponding reduction of cells in G1/S (Fig 4a-b). To investigate whether  
187 cells in G2/M have higher CWP1, mNG-tagged CWP1 cell lines were exposed to encystation  
188 stimuli and then DNA content was measured by DRAQ5 fluorescence. We found that cells with  
189 higher DNA content had higher CWP1 levels (Extended data 10a). Similarly, G2/M cells have

190 higher MYB2 levels (Extended data 10b), suggesting higher expression of CWP1 was due to  
191 higher level of MYB2. A prior study in *Giardia* has suggested the presence of a restriction point  
192 for entering encystation that functions to prevent cells in G1/S from initiating encystation but  
193 permits cells in G2/M to differentiate. It seemed possible that GARP4 might inhibit G1 cells  
194 from initiating encystation. We examined the relationship between GARP4-mNG and the cell  
195 cycle at 0 and 1.5 h of encystation. We found that GARP4-mNG fluorescence intensity was 1.5  
196 fold increased in G1/S cells after exposure to encystation stimuli but slightly decreased in cells  
197 at G2/M, suggesting lower GARP4 levels permit G2/M cells to enter encystation. Because MYB2  
198 and CWP1 levels are lower in G1 cells, we questioned if GARP4 might be an upstream repressor  
199 of MYB2. We transfected the GARP4 CRISPRi guide RNA into MYB2-NanoLuc cell line. We found  
200 that MYB2 levels rose by 1.2 fold in the GARP4 knockdown cell line, which is consistent with  
201 MYB2 ultimately regulating CWP1 levels (Fig 4d). In contrast, overexpression of GARP4 inhibited  
202 MYB2 expression by 50% and resulted in reduced CWP1 levels (Fig 4e-f). These findings suggest  
203 MYB2 is downstream of GARP4.

204 Since E2F1 and PAX1 have been shown to regulate CWP1-3 and MYB2, we sought to determine  
205 whether GARP4 modulates MYB2 through either E2F1 or PAX1. Interestingly, knockdowns of  
206 GARP4 does not alter E2F1 or PAX1 levels (Extended data 10c-d), suggesting E2F1 and PAX1 are  
207 not part of GARP4-MYB2-CWP1 pathway. Thus, MYB2 is a downstream of GARP4 but an  
208 upstream regulator of CWP1. In this model, MYB2 is repressed in cells at G1/S by GARP4, then  
209 during G2/M GARP4 levels drop and MYB2 expression is triggered to induce encystation.

210

## 211 Discussion

212 In summary, we utilized CRISPRi and our newly developed CasRX-mediated knockdown tool to  
213 identify transcription factors that regulate entry into the encystation pathway. We identified  
214 GARP4, a previously unstudied TF, as a key regulator of *Giardia's* restriction point regulating  
215 differentiation. GARP TFs are commonly considered to be plant-specific, but are also found in  
216 protists. Some plant GARP TFs are pioneering TFs for reproductive organ determination<sup>37</sup>. In  
217 this study, we found that GARP4 functions to prevent cells in G1/S from entering the  
218 encystation program. Our results provide the molecular mechanism for the restriction point  
219 that prevents entry into encystation until cells arrest in G2/M. We found that GARP4 depletion  
220 upregulates the formation of healthy cysts and therefore GARP4 is not required for cyst  
221 formation. Instead, GARP4 likely regulates the balance of parasite load, which selective  
222 pressure is expected to have optimized for maximal transmission. When exposed to encystation  
223 stimulus, GARP4 expression is triggered in the G1/S population to repress CWP1 level through  
224 inhibiting MYB2. In contrast, GARP4 levels in the G2/M population is slightly decreased, thus  
225 allowing the activation of MYB2 to enhance CWP1 production. Our model explains why the  
226 frequency of G2/M cells have higher expression of CWP1.

227 How cells sense encystation stimulus but then induce different responses based on cell cycle  
228 status remains unknown in *Giardia*. The idea that histone deacetylase may be involved in  
229 encystation regulation is quite attractive given the function as a metabolic sensor for rapid  
230 environment sensing. Only Sirutin 2.1 (GL50803\_10708) is highly expressed at early phase of  
231 encystation<sup>27</sup>. Interestingly, Sirtuin inhibitor Nicotinamide has been shown to cause G2 arrest of  
232 cell cycle<sup>38</sup>. However, our data indicates that mNG-tagged Sirtuin 2.1 only localizes to cytosol at  
233 0 and 1.5 h of encystation (Extended data 10 e,f) which is consistent with other studies<sup>39</sup>,  
234 suggesting Sirtuin 2.1 is not involved in regulating early encystation. It will be of particular  
235 interest to test whether second messengers have a role in coordinating early encystation, or act  
236 as a molecular switch to initiate differentiation into cysts.

237

## 238 **Methods**

### 239 ***Giardia* growth and encystation media**

240 *Giardia intestinalis* isolate WB clone C6 (ATCC catalog number 50803; American Type culture  
241 collection) were cultured in TYDK media at pH 7.1 supplemented with 10% adult bovine serum  
242 and 0.125 mg/ml bovine bile<sup>40</sup>. To induce encystation, cells were cultured 48 h in pH 6.8 pre-  
243 encystation media without bile then three encystation protocols were used: (1) Uppsala  
244 encystation protocol: TYDK media at pH 7.8 supplemented with 10% adult bovine serum and 5  
245 mg/ml bovine bile<sup>27</sup>; (2) Two-step protocol: TYDK media at pH 7.8 supplemented with 10%  
246 adult bovine serum, 0.25 mg/ml porcine bile and 5 mM lactic acid<sup>41</sup>; (3) Lipoprotein-deficient  
247 protocol: TYDK media at pH 7.8 supplemented with lipoprotein-deficient serum<sup>42</sup>.

### 248 **Plasmid construction**

#### 249 **mNeonGreen and NanoLuc fusions**

250 Coding sequences were PCR-amplified from *Giardia lamblia* genomic DNA. Primers sequences  
251 are indicated in supplemental excel file. The mNeonGreen and NanoLuc vectors were digested  
252 with the indicated restriction enzymes and a PCR amplicon was ligated using Gibson assembly<sup>43</sup>.  
253 The resulting constructs were linearized with the restriction enzyme indicated in supplemental  
254 excel file before electroporation for integration into the endogenous locus<sup>44</sup>. Neomycin and  
255 puromycin were used for selection.

#### 256 **CasRX expression cassette design**

257 EsCas13d (Catalog #108303), CasRX (Cat #109049), and PspCas13b (Cat#103862) were obtained  
258 from Addgene. Cas 13 fragments were PCR amplified, digested with restriction enzymes and  
259 inserted into pPAC-3HA expression cassettes under GDH promoter<sup>45</sup>. The Cas13-3HA expression  
260 vectors were linearized with Swal and electroporated into *Giardia lamblia*. To generate CasRX  
261 expression system, CRISPRi expression vector (dCas9g1pac) was used as a backbone.

262

## 263 **Design of guide RNA**

264 Guide RNA for the CRISPRi system utilized the Dawson Lab protocol <sup>28</sup>, NGG PAM sequence and  
265 *G. Lamblia* ATCC 50803 genome were selected for CRISPRi guide RNA design with Benchling.  
266 Cas13 guide RNA designs were based on the Sanjana Lab Cas13 guide tool  
267 (<https://cas13design.nygenome.org/>)<sup>46</sup>.

## 268 **In vitro bioluminescence assays**

269 *Giardia* cells were iced for 15 min and centrifuged at 700 x g for 7 min at 4°C. Cells were  
270 resuspended in cold 1X HBS (HEPES-buffered saline) and serial dilutions were made using a  
271 MOXI Z mini Automated Cell Counter Kit (Orflo, Kenchum, ID). To measure NanoLuc  
272 luminescence, 20,000 cells were loaded into white polystyrene, flat bottom 96-well plates  
273 (Corning Incorporated, Kennebunk, ME) then mixed with 10 µl of NanoGlo luciferase assay  
274 reagent (Promega). Relative luminescence units (RLU) were detected on a pre-warmed 37°C  
275 EnVision plate reader (Perkin Elmer, Waltham, MA) for 30 min to reach the maximum value.  
276 Experiments are from three independent bioreplicates. To measure CBG99 luminescence,  
277 20,000 cells were loaded into white polystyrene, flat bottom 96-well plates then mixed with 50  
278 µl of 10 mg/mL D-luciferin. Relative luminescence units (RLU) were detected as above.

## 279 **Protein blotting**

280 *Giardia* parasites were iced for 30 min then centrifuged at 700 x g for 7 min and washed twice  
281 in 1X HBS supplemented with HALT protease inhibitor (Pierce) and phenylmethylsulfonyl  
282 fluoride (PMSF). The cells were resuspended in 300 µl of lysis buffer contains 50 mM Tris-HCl  
283 pH 7.5, 150 mM NaCl, 7.5% glycerol, 0.25 mM CaCl<sub>2</sub>, 0.25 mM ATP, 0.5 mM Dithiothreitol, 0.5  
284 mM PMSF (Phenylmethylsulfonyl fluoride), 0.1% Triton X-100 and Halt protease inhibitors  
285 (Pierce). The sample was pelleted at 700 x g for 7 min, the supernatant was mixed with 2X  
286 sample buffer (Bio-Rad) and boiled at 98°C for 5 min. Protein samples were separated using  
287 sodium dodecyl sulfate (SDS) polyacrylamide gel electrophoresis. Protein transfer was  
288 performed using an Immobilon-FL membrane (Milipore). To detect tubulin, a mouse  
289 monoclonal anti-acetylated tubulin clone 6-11B-1 antibody (IgG2b; product T 6793; Sigma-  
290 Aldrich) were used at 1:2,500 and secondary anti-mouse isotype-specific antibody conjugated  
291 with Alexa 488 (anti-IgG2b) were used at 1:2,500. To detect CWP1, Alexa 647-conjugated anti-  
292 CWP1 antibody (Waterborne, New Orleans, LA) was used at 1:2,000. Multiplex immunoblots  
293 were imaged using a Chemidoc MP system (Bio-Rad).

## 294 **Immunofluorescence**

295 *Gairdia* parasites were iced for 30 min and pelleted at 700 x g for 7 min. The pellet was fixed in  
296 PME buffer (100 mM Piperazine-N,N'-bis (ethanesulfonic acid) (PIPES) pH 7.0, 5 mM EGTA, 10  
297 mM MgSO<sub>4</sub> supplemented with 1% paraformaldehyde (PFA) (Electron Microscopy Sciences,  
298 Hatfield, PA), 100 µM 3-maleimidobenzoic acid N-hydroxysuccinimide ester (Sigma-Aldrich),  
299 100 µM ethylene glycol bis (succinimidyl succinate) (Pierce), and 0.025% Triton X-100 for 30 min



300 at 37°C. Fixed cells were attached on polylysine coated coverslips. Cells were washed once in  
301 PME and permeabilized with 0.1% Triton X-100 in PME for 10 min. After two quick washes with  
302 PME, blocking was performed in PME supplemented with 1% bovine serum albumin, 0.1%  
303  $\text{NaN}_3$ , 100 mM lysine, 0.5% cold water fish skin gelatin (Sigma-Aldrich). Next, 1:200 diluted  
304 Alexa 647-conjugated anti-CWP1 antibody (Waterborne, New Orleans, LA) was added to  
305 incubate for 1 h. Cells were washed three times in PME plus 0.05% Triton X-100. Coverslips  
306 were mounted with ProLong Gold antifade plus 4',6-diamidino-2-phenylindole (DAPI;  
307 Molecular Probes). Images were acquired on a DeltaVision Elite microscope using a 60X, 1.4-  
308 numerical aperture objective with a PCO Edge sCMOS camera, and images were deconvolved  
309 using SoftWorx (API, Issaquah, WA).

### 310 **Imaging and image analysis**

311 Analyses of CWP1-stained vesicle size and number were performed with Imaris software  
312 (Bitplane, version 8.1). ImageJ was used to process all images and figures were assembled using  
313 Adobe Illustrator.

### 314 **Cyst count and cyst viability staining**

315 To collect water-resistant *Giardia* cysts, confluent *Giardia* trophozoites were incubated in  
316 encystation media supplemented with 10 g/L ovine bovine bile and calcium lactate. To count  
317 cyst, 20  $\mu\text{l}$  of 48 h encysted cells were counted using a hemocytometer. To determine cyst  
318 viability, 48 h encysted *Giardia* cells were centrifuged at 700 x g for 7 min and the pellets were  
319 washed 10 times in deionized water, then stored in distill water overnight at 4°C. Next day,  
320 fluorescein diacetate (FDA) and propidium iodide (PI) were used to stain live and dead cysts and  
321 collected images using a DeltaVision Elite microscope using a 40X, 1.4-numerical aperture  
322 objective with a PCO Edge sCMOS camera, and images were deconvolved using SoftWorx (API,  
323 Issaquah, WA).

### 324 **Flow cytometry assay**

325 Flow cytometry analyses was performed after fixation with 0.25% PFA at 4°C for 15 min. 1  $\mu\text{M}$   
326 DRAQ5 (Thermo Scientific Cat# 62251) was used to stain DNA. 10,000 cells per sample were  
327 analyzed using a FACS Canto II Flow Cytometer at the Pathology Flow Cytometry Core Facility  
328 (Department of Pathology, University of Washington). Data were analyzed using FlowJo.

### 329 **Mathematical modeling**

330 We let the number of trophozoites inside an infected host be  $T_t$  and the number of cysts  
331 produced during infection be  $C_t$ . Assuming constant rates for growth, shedding and encystation,  
332 the following differential equations describe the change in cell numbers

333

$$334 \quad \dot{T}_t = (\gamma - \lambda - \varepsilon)T_t, \quad [1.1]$$

335

336 
$$\dot{C}_t = \varepsilon T_t, \quad [1.2]$$

337

338 with  $\gamma$  as the rate of population growth of the trophozoites inside the host,  $\lambda$  as rate at which  
339 cells are lost from the host via shedding, and  $\varepsilon$  as the rate of encystation inside the host, and the  
340 dot over the dynamical variables indicating differentiation with respect to time. We note that  
341 cysts that leave the host are counted in the total number of produced cysts, but trophozoites  
342 that leave the host can no longer contribute to further growth or cyst production. Equations [1]  
343 have the following solution:

344

345 
$$T_t = T_0 e^{(\gamma - \lambda - \varepsilon)t}, \quad [2.1]$$

346

347 
$$C_t = C_0 + T_0 \frac{\varepsilon (e^{(\gamma - \lambda - \varepsilon)t} - 1)}{\gamma - \delta - \varepsilon}. \quad [2.2]$$

348

349 In this model, the trophozoite population expands exponentially (if  $\gamma - \lambda > \varepsilon$ ). We can use  
350 equation [2.2] to determine numerically the optimal encystation rate ( $\varepsilon^*$ ) to maximize the total  
351 number of cysts produced as a function of the length of the infection period ( $t$ ) and other model  
352 parameters ( $C_0$ ,  $T_0$ ,  $\gamma$ , and  $\lambda$ ). For simplicity, we assume that an infection is initiated by a single  
353 trophozoite ( $C_0 = 0$  and  $T_0 = 1$ ). For our baseline growth rate, we used a best-fit estimate from  
354 *Giardia* in encystation medium ( $\gamma = 0.363$ ) and for the high growth rate, we used a best-fit  
355 estimate from *Giardia* in TYDK medium ( $\gamma = 0.762$ ). For the shedding rates, we used  $\lambda = 0.1$  and  
356  $\lambda = 0.25$  as the baseline and high values, but the basic patterns shown in Fig. 3g also held for  
357 other values of shedding.

358

### 359 **Acknowledgements**

360 We thank members of the Paredes laboratory and our colleagues at UW Biology for discussions  
361 and comments on the manuscripts, and a big help from the flow cytometry facility at UW  
362 Pathology. We thank Photini Sinnis, Kirk Deitsch, Patricia Johnson for inviting us to participate  
363 in the 40<sup>th</sup>-Biology of Parasitism (BoP) course and all of the help from BoP students to initiate  
364 this project. We thank Dr. Scott Dawson for gifting us the CRISPRi plasmid. Research was funded  
365 by University of Washington Bridge funds and NIAD 1R21AI159035 to ARP.

366

- 367 1 Schaap, P. & Schilde, C. Encystation: the most prevalent and underinvestigated  
368 differentiation pathway of eukaryotes. *Microbiology (Reading, England)* **164**, 727-739,  
369 doi:10.1099/mic.0.000653 (2018).
- 370 2 Kumar, R. & Lloyd, D. Recent advances in the treatment of Acanthamoeba keratitis.  
371 *Clinical infectious diseases : an official publication of the Infectious Diseases Society of*  
372 *America* **35**, 434-441, doi:10.1086/341487 (2002).
- 373 3 Fakhri, Y. *et al.* The risk factors for intestinal Giardia spp infection: Global systematic  
374 review and meta-analysis and meta-regression. *Acta tropica*, 105968,  
375 doi:10.1016/j.actatropica.2021.105968 (2021).
- 376 4 Waldram, A., Vivancos, R., Hartley, C. & Lamden, K. Prevalence of Giardia infection in  
377 households of Giardia cases and risk factors for household transmission. *BMC infectious*  
378 *diseases* **17**, 486, doi:10.1186/s12879-017-2586-3 (2017).
- 379 5 Wright, S. G. Protozoan infections of the gastrointestinal tract. *Infectious disease clinics*  
380 *of North America* **26**, 323-339, doi:10.1016/j.idc.2012.03.009 (2012).
- 381 6 Argüello-García, R., Bazán-Tejeda, M. L. & Ortega-Pierres, G. Encystation commitment in  
382 Giardia duodenalis: a long and winding road. *Parasite (Paris, France)* **16**, 247-258,  
383 doi:10.1051/parasite/2009164247 (2009).
- 384 7 Lauwaet, T., Davids, B. J., Reiner, D. S. & Gillin, F. D. Encystation of Giardia lamblia: a  
385 model for other parasites. *Current opinion in microbiology* **10**, 554-559,  
386 doi:10.1016/j.mib.2007.09.011 (2007).
- 387 8 Luján, H. D., Mowatt, M. R., Byrd, L. G. & Nash, T. E. Cholesterol starvation induces  
388 differentiation of the intestinal parasite Giardia lamblia. *Proceedings of the National*  
389 *Academy of Sciences* **93**, 7628-7633, doi:10.1073/pnas.93.15.7628 (1996).
- 390 9 Barash, N. R. *et al.* Giardia Colonizes and Encysts in High-Density Foci in the Murine  
391 Small Intestine. *mSphere* **2**, doi:10.1128/mSphere.00343-16 (2017).
- 392 10 Faso, C. & Hehl, A. B. Membrane trafficking and organelle biogenesis in Giardia lamblia:  
393 use it or lose it. *International journal for parasitology* **41**, 471-480,  
394 doi:10.1016/j.ijpara.2010.12.014 (2011).
- 395 11 Bernander, R., Palm, J. E. & Svärd, S. G. Genome ploidy in different stages of the Giardia  
396 lamblia life cycle. *Cellular microbiology* **3**, 55-62, doi:10.1046/j.1462-5822.2001.00094.x  
397 (2001).
- 398 12 Byers, T. J., Kim, B. G., King, L. E. & Hugo, E. R. Molecular aspects of the cell cycle and  
399 encystment of Acanthamoeba. *Reviews of infectious diseases* **13 Suppl 5**, S373-384,  
400 doi:10.1093/clind/13.supplement\_5.s373 (1991).
- 401 13 Eichinger, D. Encystation of entamoeba parasites. *BioEssays : news and reviews in*  
402 *molecular, cellular and developmental biology* **19**, 633-639, doi:10.1002/bies.950190714  
403 (1997).
- 404 14 Svärd, S. G., Hagblom, P. & Palm, J. E. D. Giardia lamblia — a model organism for  
405 eukaryotic cell differentiation. *FEMS Microbiology Letters* **218**, 3-7, doi:10.1111/j.1574-  
406 6968.2003.tb11490.x (2003).
- 407 15 Larson, E. D., Marsh, A. J. & Harrison, M. M. Pioneering the developmental frontier.  
408 *Molecular cell* **81**, 1640-1650, doi:10.1016/j.molcel.2021.02.020 (2021).

- 409 16 Sun, C. H., Su, L. H. & Gillin, F. D. Novel plant-GARP-like transcription factors in *Giardia*  
410 *lamblia*. *Molecular and biochemical parasitology* **146**, 45-57,  
411 doi:10.1016/j.molbiopara.2005.10.017 (2006).
- 412 17 Su, L.-H. *et al.* A Novel E2F-like Protein Involved in Transcriptional Activation of Cyst Wall  
413 Protein Genes in *Giardia lamblia*\*. *Journal of Biological Chemistry* **286**, 34101-34120,  
414 doi:<https://doi.org/10.1074/jbc.M111.280206> (2011).
- 415 18 Pan, Y. J., Cho, C. C., Kao, Y. Y. & Sun, C. H. A novel WRKY-like protein involved in  
416 transcriptional activation of cyst wall protein genes in *Giardia lamblia*. *J Biol Chem* **284**,  
417 17975-17988, doi:10.1074/jbc.M109.012047 (2009).
- 418 19 Chuang, S.-F., Su, L.-H., Cho, C.-C., Pan, Y.-J. & Sun, C.-H. Functional Redundancy of Two  
419 Pax-Like Proteins in Transcriptional Activation of Cyst Wall Protein Genes in *Giardia*  
420 *lamblia*. *PLOS ONE* **7**, e30614, doi:10.1371/journal.pone.0030614 (2012).
- 421 20 Wang, Y.-T. *et al.* A novel pax-like protein involved in transcriptional activation of cyst  
422 wall protein genes in *Giardia lamblia*. *J Biol Chem* **285**, 32213-32226,  
423 doi:10.1074/jbc.M110.156620 (2010).
- 424 21 Wang, C. H., Su, L. H. & Sun, C. H. A novel ARID/Bright-like protein involved in  
425 transcriptional activation of cyst wall protein 1 gene in *Giardia lamblia*. *J Biol Chem* **282**,  
426 8905-8914, doi:10.1074/jbc.M611170200 (2007).
- 427 22 Waldman, B. S. *et al.* Identification of a Master Regulator of Differentiation in  
428 *Toxoplasma*. *Cell* **180**, 359-372.e316, doi:10.1016/j.cell.2019.12.013 (2020).
- 429 23 Sun, C.-H., Palm, D., McArthur, A. G., Svärd, S. G. & Gillin, F. D. A novel Myb-related  
430 protein involved in transcriptional activation of encystation genes in *Giardia lamblia*.  
431 *Molecular Microbiology* **46**, 971-984, doi:[https://doi.org/10.1046/j.1365-](https://doi.org/10.1046/j.1365-2958.2002.03233.x)  
432 [2958.2002.03233.x](https://doi.org/10.1046/j.1365-2958.2002.03233.x) (2002).
- 433 24 Ehrenkaufer, G. M., Hackney, J. A. & Singh, U. A developmentally regulated Myb domain  
434 protein regulates expression of a subset of stage-specific genes in *Entamoeba*  
435 *histolytica*. *Cellular microbiology* **11**, 898-910, doi:10.1111/j.1462-5822.2009.01300.x  
436 (2009).
- 437 25 Faso, C., Bischof, S. & Hehl, A. B. The proteome landscape of *Giardia lamblia* encystation.  
438 *PLoS One* **8**, e83207, doi:10.1371/journal.pone.0083207 (2013).
- 439 26 Pham, J. K. *et al.* Transcriptomic Profiling of High-Density *Giardia* Foci Encysting in the  
440 Murine Proximal Intestine. *Frontiers in cellular and infection microbiology* **7**,  
441 doi:10.3389/fcimb.2017.00227 (2017).
- 442 27 Einarsson, E. *et al.* Coordinated Changes in Gene Expression Throughout Encystation of  
443 *Giardia intestinalis*. *PLOS Neglected Tropical Diseases* **10**, e0004571,  
444 doi:10.1371/journal.pntd.0004571 (2016).
- 445 28 McNally, S. G. *et al.* Robust and stable transcriptional repression in *Giardia* using  
446 CRISPRi. *Molecular biology of the cell* **30**, 119-130, doi:10.1091/mbc.E18-09-0605  
447 (2019).
- 448 29 Pham, J. K. *et al.* Transcriptomic Profiling of High-Density *Giardia* Foci Encysting in the  
449 Murine Proximal Intestine. *Frontiers in cellular and infection microbiology* **7**, 227,  
450 doi:10.3389/fcimb.2017.00227 (2017).

- 451 30 Masser, A. E., Kandasamy, G., Kaimal, J. M. & Andréasson, C. Luciferase NanoLuc as a  
452 reporter for gene expression and protein levels in *Saccharomyces cerevisiae*. *Yeast*  
453 (*Chichester, England*) **33**, 191-200, doi:10.1002/yea.3155 (2016).
- 454 31 England, C. G., Ehlerding, E. B. & Cai, W. NanoLuc: A Small Luciferase Is Brightening Up  
455 the Field of Bioluminescence. *Bioconjugate chemistry* **27**, 1175-1187,  
456 doi:10.1021/acs.bioconjchem.6b00112 (2016).
- 457 32 Konermann, S. *et al.* Transcriptome Engineering with RNA-Targeting Type VI-D CRISPR  
458 Effectors. *Cell* **173**, 665-676.e614, doi:10.1016/j.cell.2018.02.033 (2018).
- 459 33 Cox, D. B. T. *et al.* RNA editing with CRISPR-Cas13. *Science (New York, N.Y.)* **358**, 1019-  
460 1027, doi:10.1126/science.aaq0180 (2017).
- 461 34 Huang, Y.-C. *et al.* Regulation of Cyst Wall Protein Promoters by Myb2 in *Giardia*  
462 *lamblia*\*. *Journal of Biological Chemistry* **283**, 31021-31029,  
463 doi:<https://doi.org/10.1074/jbc.M805023200> (2008).
- 464 35 Reiner, D. S. *et al.* Synchronisation of *Giardia lamblia*: identification of cell cycle stage-  
465 specific genes and a differentiation restriction point. *International journal for*  
466 *parasitology* **38**, 935-944, doi:10.1016/j.ijpara.2007.12.005 (2008).
- 467 36 Dawson, S. C., Nohýnková, E. & Cipriano, M. in *Giardia: A Model Organism* (eds Hugo D.  
468 Luján & Staffan Svärd) 161-183 (Springer Vienna, 2011).
- 469 37 Safi, A. *et al.* The world according to GARP transcription factors. *Current opinion in plant*  
470 *biology* **39**, 159-167, doi:10.1016/j.pbi.2017.07.006 (2017).
- 471 38 Lagunas-Rangel, F. A., Bazán-Tejeda, M. L., García-Villa, E. & Bermúdez-Cruz, R. M.  
472 Nicotinamide induces G2 cell cycle arrest in *Giardia duodenalis* trophozoites and  
473 promotes changes in sirtuins transcriptional expression. *Experimental Parasitology* **209**,  
474 107822, doi:<https://doi.org/10.1016/j.exppara.2019.107822> (2020).
- 475 39 Herrera T, E. A., Contreras, L. E., Suárez, A. G., Díaz, G. J. & Ramírez, M. H. GISir2.1 of  
476 *Giardia lamblia* is a NAD<sup>+</sup>-dependent cytoplasmic deacetylase. *Heliyon* **5**, e01520,  
477 doi:<https://doi.org/10.1016/j.heliyon.2019.e01520> (2019).
- 478 40 Keister, D. B. Axenic culture of *Giardia lamblia* in TYI-S-33 medium supplemented with  
479 bile. *Transactions of the Royal Society of Tropical Medicine and Hygiene* **77**, 487-488,  
480 doi:10.1016/0035-9203(83)90120-7 (1983).
- 481 41 Gillin, F. D., Boucher, S. E., Rossi, S. S. & Reiner, D. S. *Giardia lamblia*: the roles of bile,  
482 lactic acid, and pH in the completion of the life cycle in vitro. *Exp Parasitol* **69**, 164-174,  
483 doi:10.1016/0014-4894(89)90185-9 (1989).
- 484 42 Luján, H. D., Mowatt, M. R., Byrd, L. G. & Nash, T. E. Cholesterol starvation induces  
485 differentiation of the intestinal parasite *Giardia lamblia*. *Proceedings of the National*  
486 *Academy of Sciences of the United States of America* **93**, 7628-7633,  
487 doi:10.1073/pnas.93.15.7628 (1996).
- 488 43 Gibson, D. G. *et al.* Enzymatic assembly of DNA molecules up to several hundred  
489 kilobases. *Nature Methods* **6**, 343-345, doi:10.1038/nmeth.1318 (2009).
- 490 44 Gourguechon, S., Holt, L. J. & Cande, W. Z. The *Giardia* cell cycle progresses  
491 independently of the anaphase-promoting complex. *Journal of cell science* **126**, 2246-  
492 2255, doi:10.1242/jcs.121632 (2013).
- 493 45 Gourguechon, S. & Cande, W. Z. Rapid tagging and integration of genes in *Giardia*  
494 *intestinalis*. *Eukaryotic cell* **10**, 142-145, doi:10.1128/ec.00190-10 (2011).

495 46 Wessels, H. H. *et al.* Massively parallel Cas13 screens reveal principles for guide RNA  
496 design. *Nature biotechnology* **38**, 722-727, doi:10.1038/s41587-020-0456-9 (2020).

497

498 **Figure 1 | GARP4 and MYB1 are early signaling TFs.** **a**, Quantification of endogenously tagged  
499 CWP1-NLuc, CWP2-NLuc, and CWP3-NLuc after 0, 1.5, and 4 h exposure to encystation medium  
500 (Uppsala medium). Expression level from each time point has three biological replicates. Fold  
501 change is normalized to 0 h. **b**, Localizations of MYB2-mNG after 0, 1.5, and 4 h exposure to  
502 Uppsala medium. **c**, Localizations of PAX1-mNG, GARP4-mNG and MYB1-mNG after 0 and 1.5 h  
503 exposure to Uppsala medium. **d**, Relative expression of GARP4-NLuc, MYB1-NLuc, MYB2-NLuc,  
504 and GAPDH-NLuc after 0, 1.5, 4, 7h exposure to Uppsala medium. Expression level from each  
505 time point has three biological replicates. The fold change is normalized to 0 h. Bars, 10  $\mu$ m.

506

507 **Figure 2 | Depletion of GARP4 increases CWP1 level and cyst number.** **a**, Quantification of  
508 CRISPRi-mediated knockdowns of MYB2 at 4h into encystation. The expression level is  
509 normalized by a dCas9 control. **b**, Immunoblot of CWP1 and tubulin from MYB2 knockdowns at  
510 4h into encystation. **c**, Quantification of immunoblots of CWP1 and tubulin from MYB2  
511 knockdowns. The expression level is normalized to tubulin. **d**, Quantification of cysts for MYB2  
512 knockdown and control after 48 h of encystation. Cyst counts were performed by  
513 hemocytometer. **e**, Quantification of CRISPRi-mediated knockdown of MYB1 at 1.5h into  
514 encystation. **f**, Immunoblot of CWP1 and tubulin from MYB1 knockdown at 4h into encystation.  
515 **g**, Quantification of immunoblots of CWP1 and tubulin from MYB1 knockdowns at 4h into  
516 encystation. **h**, Quantification of cysts for MYB1 knockdown and control after 48 h of  
517 encystation. **i**, Quantification of CRISPRi-mediated knockdown of GARP4 at 1.5h into  
518 encystation. **j**, Immunoblot of CWP1 and tubulin from GARP4 knockdown at 4h into  
519 encystation. **k**, Quantification of immunoblots of CWP1 and tubulin from GARP4 knockdown. **l**,  
520 Quantification of cyst number of GARP4 knockdown after 48 h encystation. All quantification is  
521 from three independent biological replicates which included four technical replicates for cyst  
522 counts. Data are mean  $\pm$  s.d. Student's t-test, \* $p < 0.01$ , \*\* $p < 0.001$ , \*\*\* $p < 0.0001$ ,  
523 \*\*\*\* $p < 0.00001$ , ns= not significant.

524

525 **Figure 3| GARP4 regulates encystation rates.** **a**, Relative protein levels of MYB1-NLuc, MYB2-  
526 NLuc, and GARP4-NLuc after 0, 0.5, 1 and 2 h exposure to encystation medium (Uppsala medium).  
527 The expression level from each time point has three biological replicates. The fold change is  
528 normalized to 0 h. **b**, Relative expression of CWP1-NLuc in GARP4 knockdowns after 0, 0.5, 1,2,3  
529 and 4 h exposure to encystation medium (Uppsala medium). The expression level from each time  
530 point has three biological replicates. The fold change is normalized to 0 h dCas9-Ctrl. **c**, CWP1  
531 and DAPI staining at 24 h of encystation for dCas9-Ctrl, GARP4-gRNA247 and GARP4-gRNA362  
532 cell lines. Bars, 100  $\mu$ m. **d**, Quantification of encysting cells at 24 h post induction of encystation

533 for dCas9-Ctrl, GARP4-gRNA247 and GARP4-gRNA362 cell lines as determined by CWP1  
534 expression. Data are mean  $\pm$  s.d. from three independent experiments (total cells counted for  
535 dCas9-Ctrl n=1830, GARP4-g362 n=1747, GARP4-g247 n=1783) Student's t-test, \*p<0.01. **e**,  
536 IMARIS-assisted analysis of vesicle number in 4 h encysting cells of dCas9-Ctrl, GARP4-gRNA247  
537 and GARP4-gRNA362 cell lines. **f**, IMARIS-assisted analysis of vesicle volume of 4 h encysting cells  
538 of dCas9-Ctrl, GARP4-gRNA247 and GARP4-gRNA362 cell lines. n.s.= not significant. n=63 cells for  
539 dCas9-Ctrl. n= 93 for GARP4-g362. **g**, Using our dynamical model, we numerically determine the  
540 optimal encystation rate as a function of the period of infection for a baseline set of parameters  
541 (specifically,  $\gamma = 0.363 \text{ day}^{-1}$ ,  $\lambda = 0.1 \text{ day}^{-1}$ ,  $T_0 = 1$  cell, and  $C_0 = 0$  cells; see Methods). The  
542 result is the thick black curve. We then repeat the analysis but increase the rate of trophozoite  
543 growth ( $\gamma = 0.762 \text{ day}^{-1}$ ) or increase the rate of shedding ( $\lambda = 0.25 \text{ day}^{-1}$ ), which yields the blue  
544 and red curves, respectively. **h**, Quantification of cyst number in GARP4 knockdown from daily  
545 supplement of fresh encystation medium (removed detached cells and cysts). **i**, Quantification of  
546 trophozoite number in GARP4 knockdown from daily supplement of fresh encystation medium.

547

548 **Figure 4 | GARP4 is part of the restriction point that prevents G1 cells from encysting.** **a**, Flow  
549 cytometry analysis of DRAQ5 and GARP4-mNG at 0 and 1.5 h of encystation. Red line is the  
550 separation point between G1/S and G2/M phases. **b**, Quantification of G1/S and G2/M cells  
551 from 0 and 1.5 h encystation. Data are mean  $\pm$  s.d. (n=3, 10,000 cells per replicate) Student's t-  
552 test, \*\*p<0.001. **c**, Quantification of GARP4-mNG fluorescence intensity for G1/S and G2/M  
553 cells at 0 and 1.5 h of encystation. Data are mean  $\pm$  s.d. (n=3) Student's t-test, \*\*\*\*p<0.0001. **d**,  
554 Quantification of relative expressions of MYB2 from dCas9 control and GARP4-gRNA362 cell  
555 lines. \*\*\*\*p<0.00001. **e**, Fluorescent imaging of pTET::GARP4-mNG with and without  
556 tetracycline induction. Bars, 10  $\mu\text{m}$ . **f**, Quantification of relative expressions of MYB2 after 4 h  
557 of encystation from tetracycline-induced GARP4-mNG overexpression cell lines.  
558 \*\*\*\*p<0.00001.

559

560 **Extended Data Figure 1 | Localizations of encystation-induced genes.** Localizations of mNG-  
561 tagged E2F1 (GL50803\_23756), GARP3 (GL50803\_9154), PAX1 (GL50803\_32686), CCAAT-  
562 binding subunit C (GL50803\_14553), CCR4-NOT subunit 7 (GL50809\_8209), CCAAT-binding  
563 subunit A (GL50803\_7231) and CCR-NOT subunit 7 (GL50803\_10606) after 0 and 1.5 h exposure  
564 to Uppsala encystation medium. Bars, 10  $\mu\text{m}$ .

565 **Extended Data Figure 2 | E2F1, PAX1 and ARID2 are induced at 4h.** Relative expression of E2F1-  
566 NLuc, PAX1-NLuc, ARID2-NLuc, and GAPDH-NLuc after 0, 1.5, 4, 7h exposure to Uppsala  
567 medium. The expression level from each time point has three biological replicates. The fold  
568 change is normalized by 0 h. E2F1, PAX, and ARID2 are significantly upregulated at 4 h.

569 **Extended Data Figure 3 | Giardia CRISPRi and CasRX design.** **a-b**, Heterologous expression of  
570 3HA tagged PsCas13b, CasRX, and EsCas13d in *Giardia*. pGDH= promoter of glyceraldehyde 3-

571 phosphate dehydrogenase (GL50803\_6877). HA=Hemagglutinin. **c**, Schematic of CRISPRi  
572 vector dCas9g1pac and CasRX vector design. pMDH= promoter of malate dehydrogenase,  
573 pac=puromycin resistance marker, 2340NLS=GL50803\_2340 nuclear localization signal,  
574 SCF=gRNA scaffold sequence, DR=Direct repeat for CasRX, pU6=Giardia U6 promoter. **d**,  
575 Localizations of 3XHA tagged dCas9 and CasRX with DAPI staining in *Giardia*. **e**, Quantification of  
576 cells with detectable dCas9 and CasRX expression. ns=not significant. Data are mean  $\pm$  s.d. from  
577 three independent experiments (dCas9 n=3278, CasRX n=3327 cells) Student's t-test. **f**, Growth  
578 curve of dCas9 and CasRX expressing cell lines. Blue=CasRX, Red=dCas9. Bars, 100  $\mu$ m.

579 **Extended Data Figure 4 | Screen of guide RNAs with CRISPRi and CasRX systems. a-h**, Relative  
580 quantification of protein levels using the indicated CRISPRi or CasRX gRNAs. Levels were  
581 normalized to non-specific gRNA controls. **a**, Quantification of CWP1 (GL50803\_5638). **b**,  
582 Quantification of NanoLuc levels. **c**, Quantification of MYB1 levels (GL50803\_5347). **d**,  
583 Quantification of ARID2 levels (GL50803\_8102). **e**, Quantification of E2F1 levels  
584 (GL50803\_23756). **f**, Quantification of PAX1 levels (GL50803\_32686). **g**, Quantification of  
585 GARP4 levels (GL50803\_33232). **h**, Quantification of MYB2 levels (GL50803\_8722). All  
586 experiments are from three independent biological replicates. Data are mean  $\pm$  s.d. (n=3)  
587 Student's t-test, \*p<0.01, \*\*p<0.001, \*\*\*p<0.0001, \*\*\*\*p<0.00001, ns= not significant.

588 **Extended Data Figure 5 | Proportion of cells encysting after inducing encystation for 4 h in**  
589 **knockdowns of E2F1, PAX1 and ARID2. a**, Relative CWP2 levels in knockdowns of MYB1, GARP4  
590 and MYB2 4 h post induction of encystation. Data are mean  $\pm$  s.d. from three independent  
591 experiments (total cells counted for **b-d**, Quantification of CWP1 positive cells 4 h post  
592 induction of encystation in the indicated cell lines. **b**, dCas9-Ctrl n=626, E2F1-gRNA803 n=655; **c**,  
593 dCas9-Ctrl n=638, PAX1-gRNA438 n=640; **d**, CasRX-Ctrl n=625, ARID2-gRNA235 n=447 cells)  
594 Student's t-test, \*p<0.01, \*\*p<0.001, \*\*\*\*p<0.00001, ns= not significant.

595 **Extended Data Figure 6 | Knockdown of GARP4 and MYB1 do not alter cyst viability. a**, GARP4-  
596 gRNA362 derived cysts stained with FDA (fluorescein diacetate, green) and PI (propidium  
597 iodine, magenta) to determine viability. **b**, Quantification of **a**. **c**, MYB1-gRNA1368 derived cysts  
598 stained with FDA and PI. **d**, Quantification of **c**. **e**, MYB2-gRNA669 derived cysts stained with  
599 FDA and PI. All cell lines were encysted for 48 h. Data are mean  $\pm$  s.d. from three biological  
600 replicates (total cysts counted for dCas9-Ctrl n=400, GARP4-gRNA362 n=499, MYB1-gRNA1368  
601 n=399) Student's t-test, \*p<0.01, \*\*p<0.001, \*\*\*p<0.0001, \*\*\*\*p<0.00001, ns= not significant.  
602 Bars, 100  $\mu$ m.

603 **Extended Data Figure 7 | Knockdowns of E2F1, PAX1, and ARID2 in Giardia. a-c**, Quantification  
604 of CRISPRi (or CasRX)-mediated knockdowns of E2F1 (GL50803\_23756), PAX1  
605 (GL50803\_32686), and ARID2 (GL50803\_8102). The expression level is normalized to the  
606 corresponding dCas9 or CasRX control. **d-f**, Immunoblots of CWP1 and tubulin from E2F1, PAX1,  
607 and ARID2 knockdowns at 4 h of encystation. **g-i**, Quantification of immunoblots of CWP1 and  
608 tubulin from E2F1, PAX1, and ARID2 knockdowns. The expression level is normalized by tubulin



609 control. All experiments are from three independent biological replicates. Data are mean  $\pm$  s.d.  
610 (n=3) Student's t-test, \*p<0.01, \*\*p<0.001, \*\*\*p<0.0001, \*\*\*\*p<0.00001, ns= not significant.

611

612 **Extended Data Figure 8 | Knockdown of GARP4 does not alter growth rate or cell viability. a,**  
613 Cell growth assay for dCas9 control and GARP4 knockdown strains. All cultures were started  
614 with 200,000 cells and then cell concentration was determined with a MOXI Z counter at 1, 2,  
615 and 3 days. **b,** Cell viability of dCas9 control and GARP4 knockdowns at 1, 2, 3 days as  
616 determined by ATP dependent luminescence. Three independent replicates of 200,000  
617 cells/well were assayed in a plate reader. Black, dCas9 control. Red, GARP4-gRNA362. Green,  
618 GARP4-gRNA247. **c,** Representative images of CWP1 stained vesicles in dCas9 control and  
619 GARP4-gRNA362 cell lines. **d,** Relative CWP1 levels in GARP4 knockdowns at 4 h of encystation  
620 with lipoprotein-deficient or two step encystation media. **e,** Fluorescence level of *pTET::GARP4-*  
621 *mNG* with and without tetracycline induction. **f,** Relative CWP1 levels in GARP4-overexpression  
622 cell line at 4 h encystation. 20 mg/ml tetracycline were added to induce. Data are mean  $\pm$  s.d.  
623 (n=3) Student's t-test, \*p<0.01, \*\*p<0.001, \*\*\*\*p<0.00001.

624

625 **Extended Data Figure 9 | Knockdown of GARP4 increases encystation rates. a,** Quantification  
626 of CWP1 positives cells in control and GARP4 knockdown strains at 0 h, 2h, and 4h post  
627 induction of encystation. Data are mean  $\pm$  s.d. from three biological replicates (total cells  
628 counted for 0 h: dCas9-Ctrl n=4927, GARP4-gRNA247 n=4927, GARP4-gRNA362 n=5808; 2h:  
629 dCas9-Ctrl n=5785, GARP4-gRNA247 n=5785, GARP4-gRNA362 n=6041, 4 h: dCas9-Ctrl n=5312,  
630 GARP4-gRNA247 n=5312, GARP4-gRNA362 n=4988 cells) Student's t-test, \*p<0.01, \*\*p<0.001,  
631 \*\*\*p<0.0001, \*\*\*\*p<0.00001. Bars, 100  $\mu$ m.

632

633 **Extended Data Figure 10 | G2/M cells have higher levels of CWP1 and MYB2. a,** CWP1-mNG  
634 fluorescence intensity of DRAQ5-stained cells at 0 and 1.5 h of encystation. **b,** MYB2-mNG  
635 fluorescence intensity of DRAQ5-stained cells at 0 and 1.5 h of encystation. **c,** Relative E2F1  
636 levels in GARP4 knockdown cell line at 4 h of encystation. **d,** Relative PAX1 levels in GARP4  
637 knockdown cell line at 4 h of encystation. **e,** GiSir2.1-mNeonGreen localization at 0 and 1.5 h  
638 post induction of encystation. Bars, 10  $\mu$ m.

639

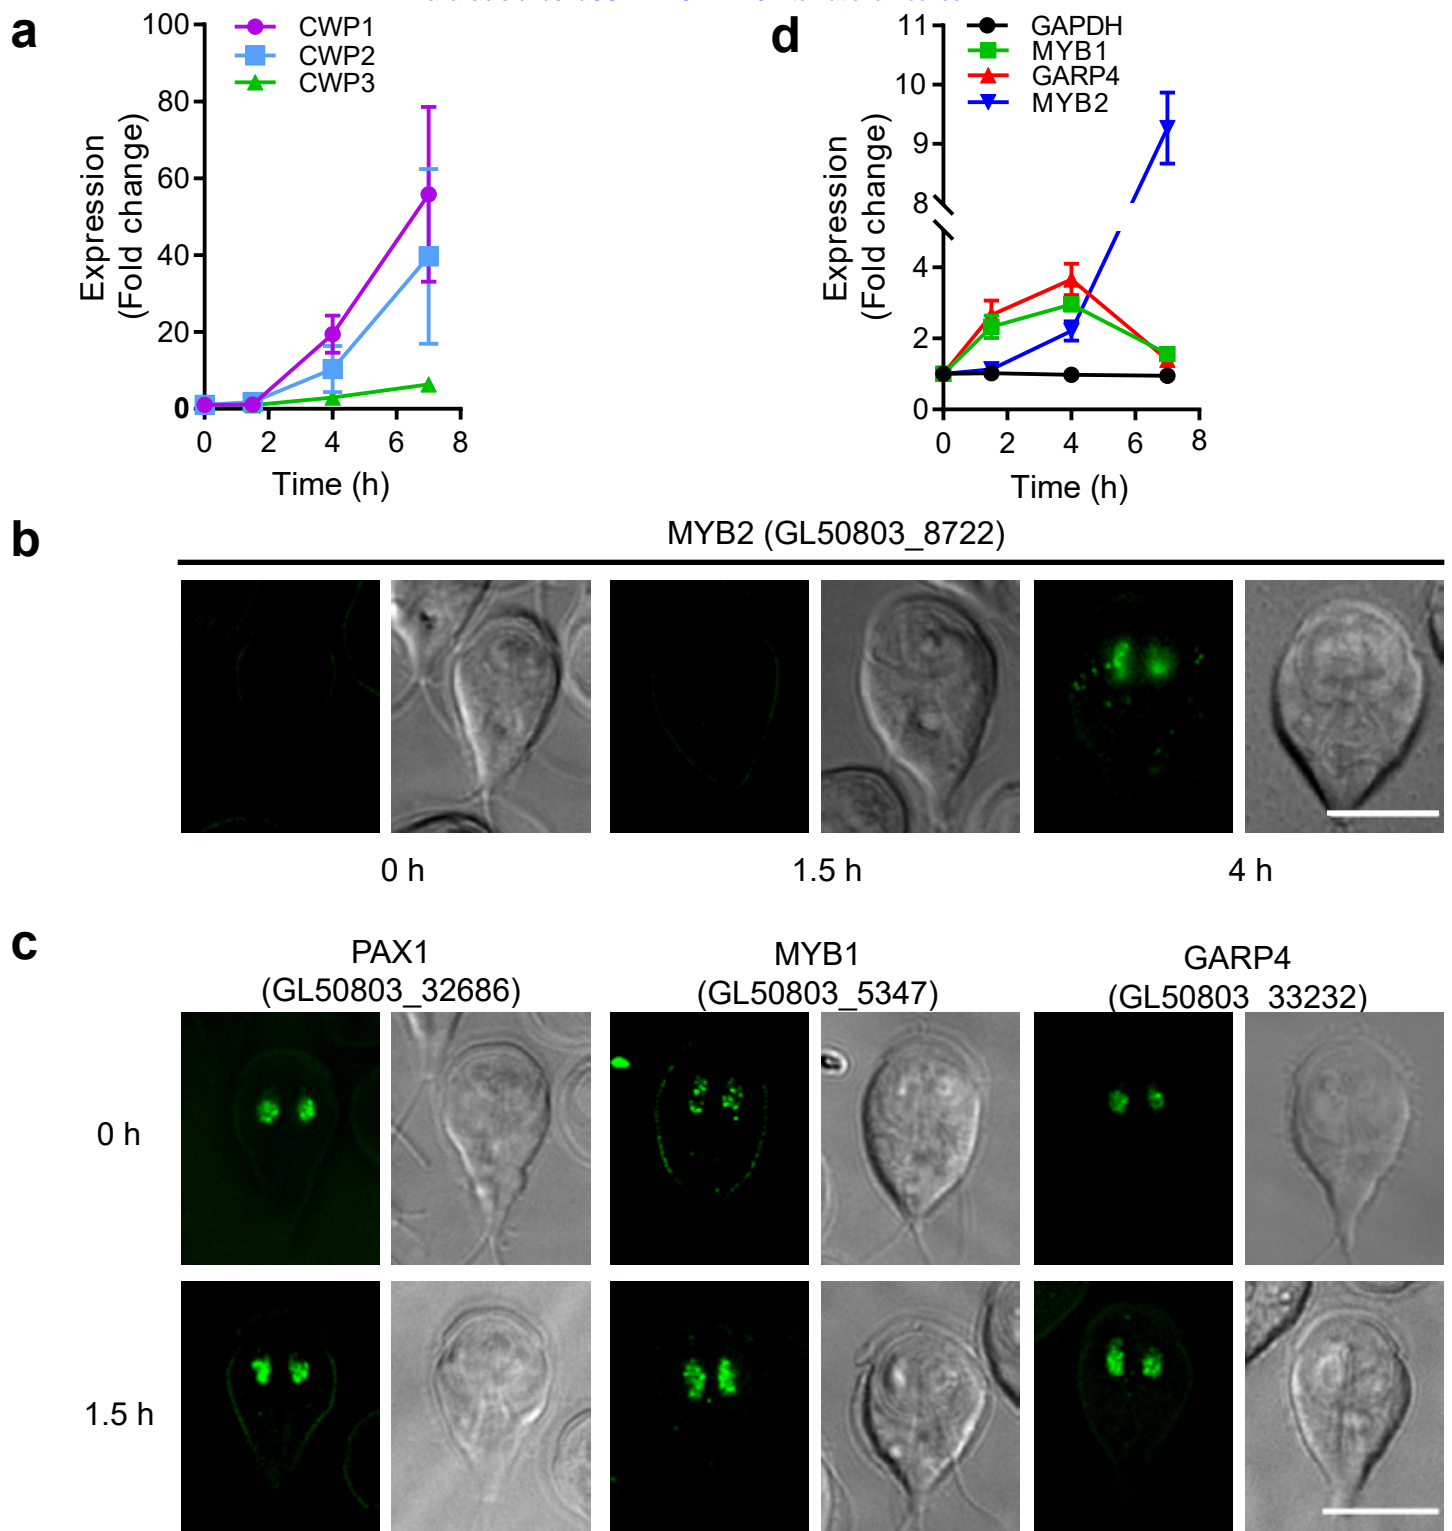

Figure 1 | GARP4 and MYB1 are early signaling TFs. a, Quantification of endogenously tagged CWP1-NLuc, CWP2-NLuc, and CWP3-NLuc after 0, 1.5, and 4 h exposure to encystation medium (Uppsala medium). Expression level from each time point has three biological replicates. Fold change is normalized to 0 h. b, Localizations of MYB2-mNG after 0, 1.5, and 4 h exposure to Uppsala medium. c, Localizations of PAX1-mNG, GARP4-mNG and MYB1-mNG after 0 and 1.5 h exposure to Uppsala medium. d, Relative expression of GARP4-NLuc, MYB1-NLuc, MYB2-NLuc, and GAPDH-NLuc after 0, 1.5, 4, 7h exposure to Uppsala medium. Expression level from each time point has three biological replicates. The fold change is normalized to 0 h. Bars, 10  $\mu$ m.

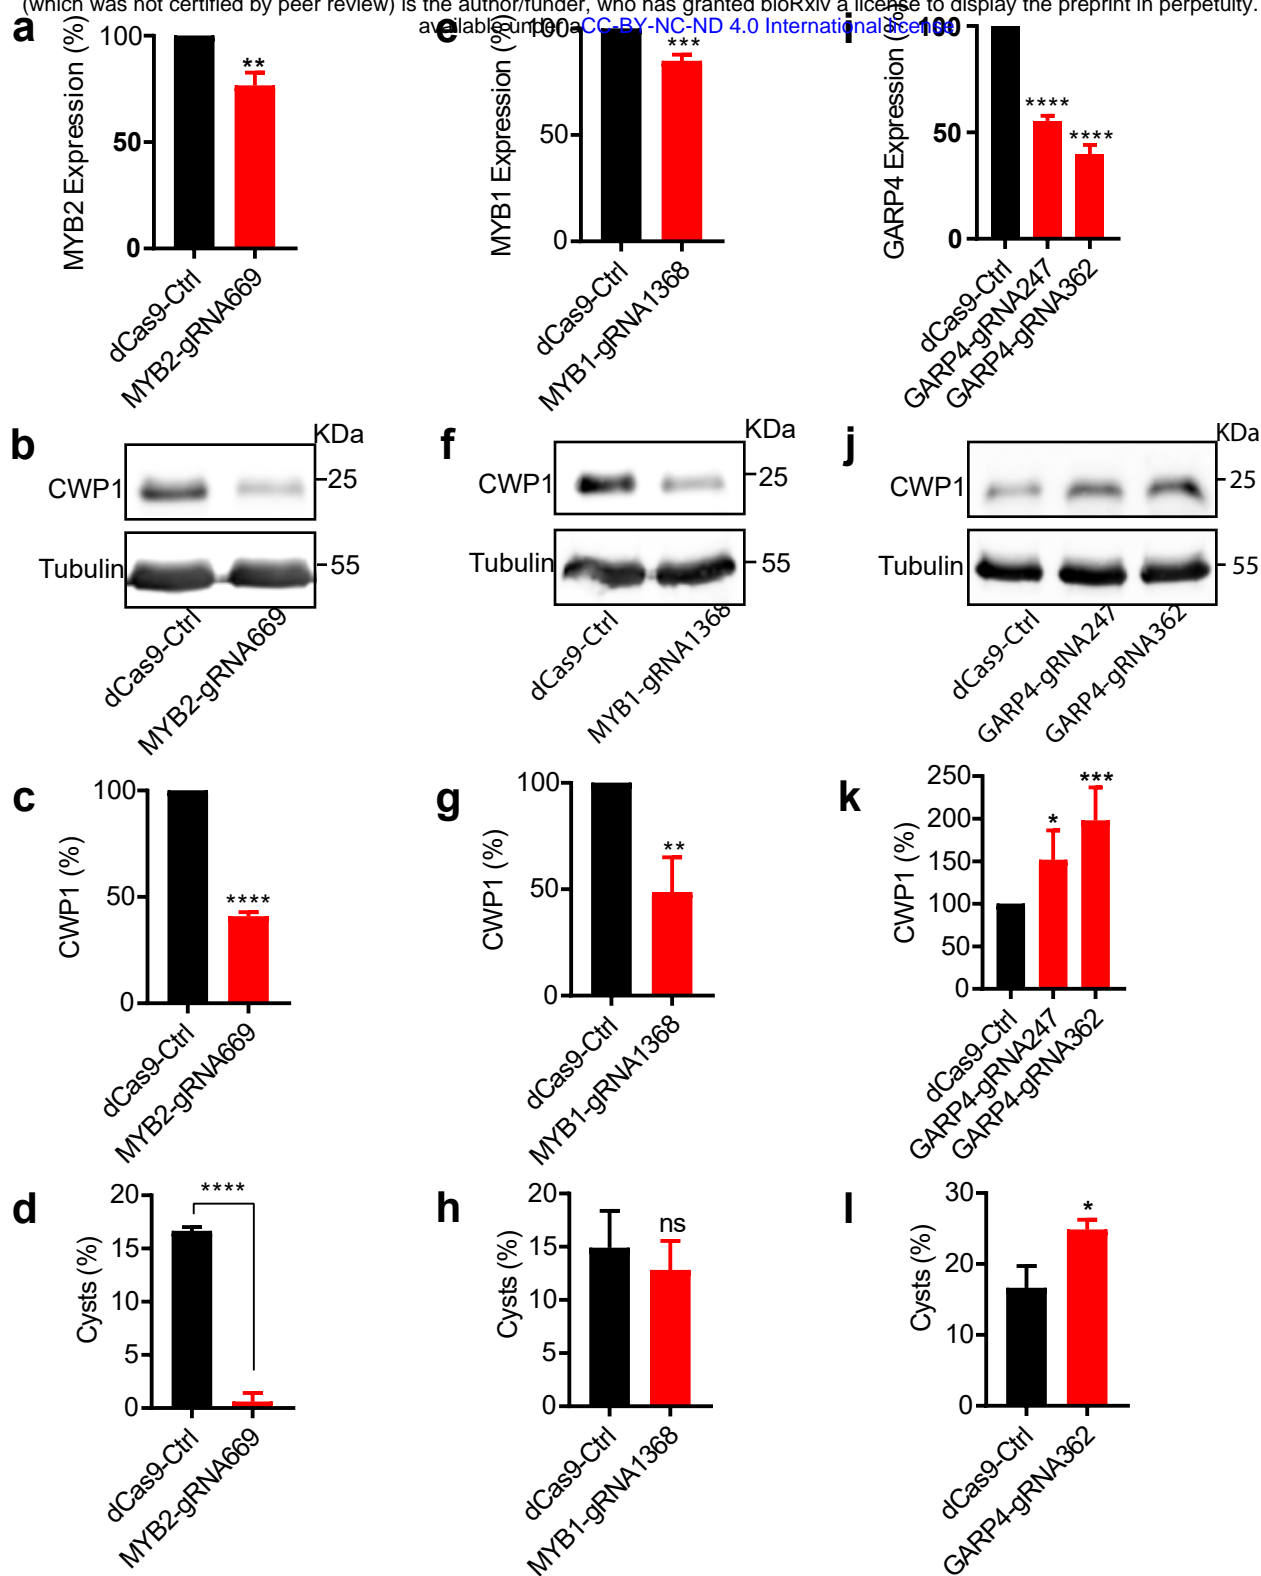

Figure 2 | Depletion of GARP4 increases CWP1 level and cyst number. a, Quantification of CRISPRi-mediated knockdowns of MYB2 at 4h into encystation. The expression level is normalized by a dCas9 control. b, Immunoblot of CWP1 and tubulin from MYB2 knockdowns at 4h into encystation. c, Quantification of immunoblots of CWP1 and tubulin from MYB2 knockdowns. The expression level is normalized to tubulin. d, Quantification of cysts for MYB2 knockdown and control after 48 h of encystation. Cyst counts were performed by hemocytometer. e, Quantification of CRISPRi-mediated knockdown of MYB1 at 1.5h into encystation. f, Immunoblot of CWP1 and tubulin from MYB1 knockdown at 4h into encystation. g, Quantification of immunoblots of CWP1 and tubulin from MYB1 knockdowns at 4h into encystation. h, Quantification of cysts for MYB1 knockdown and control after 48 h of encystation. i, Quantification of CRISPRi-mediated knockdown of GARP4 at 1.5h into encystation. j, Immunoblot of CWP1 and tubulin from GARP4 knockdown at 4h into encystation. k, Quantification of immunoblots of CWP1 and tubulin from GARP4 knockdown. l, Quantification of cyst number of GARP4 knockdown after 48 h encystation. All quantification is from three independent biological replicates which included four technical replicates for cyst counts. Data are mean  $\pm$  s.d. Student's t-test, \* $p < 0.01$ , \*\* $p < 0.001$ , \*\*\* $p < 0.0001$ , \*\*\*\* $p < 0.00001$ , ns= not significant.

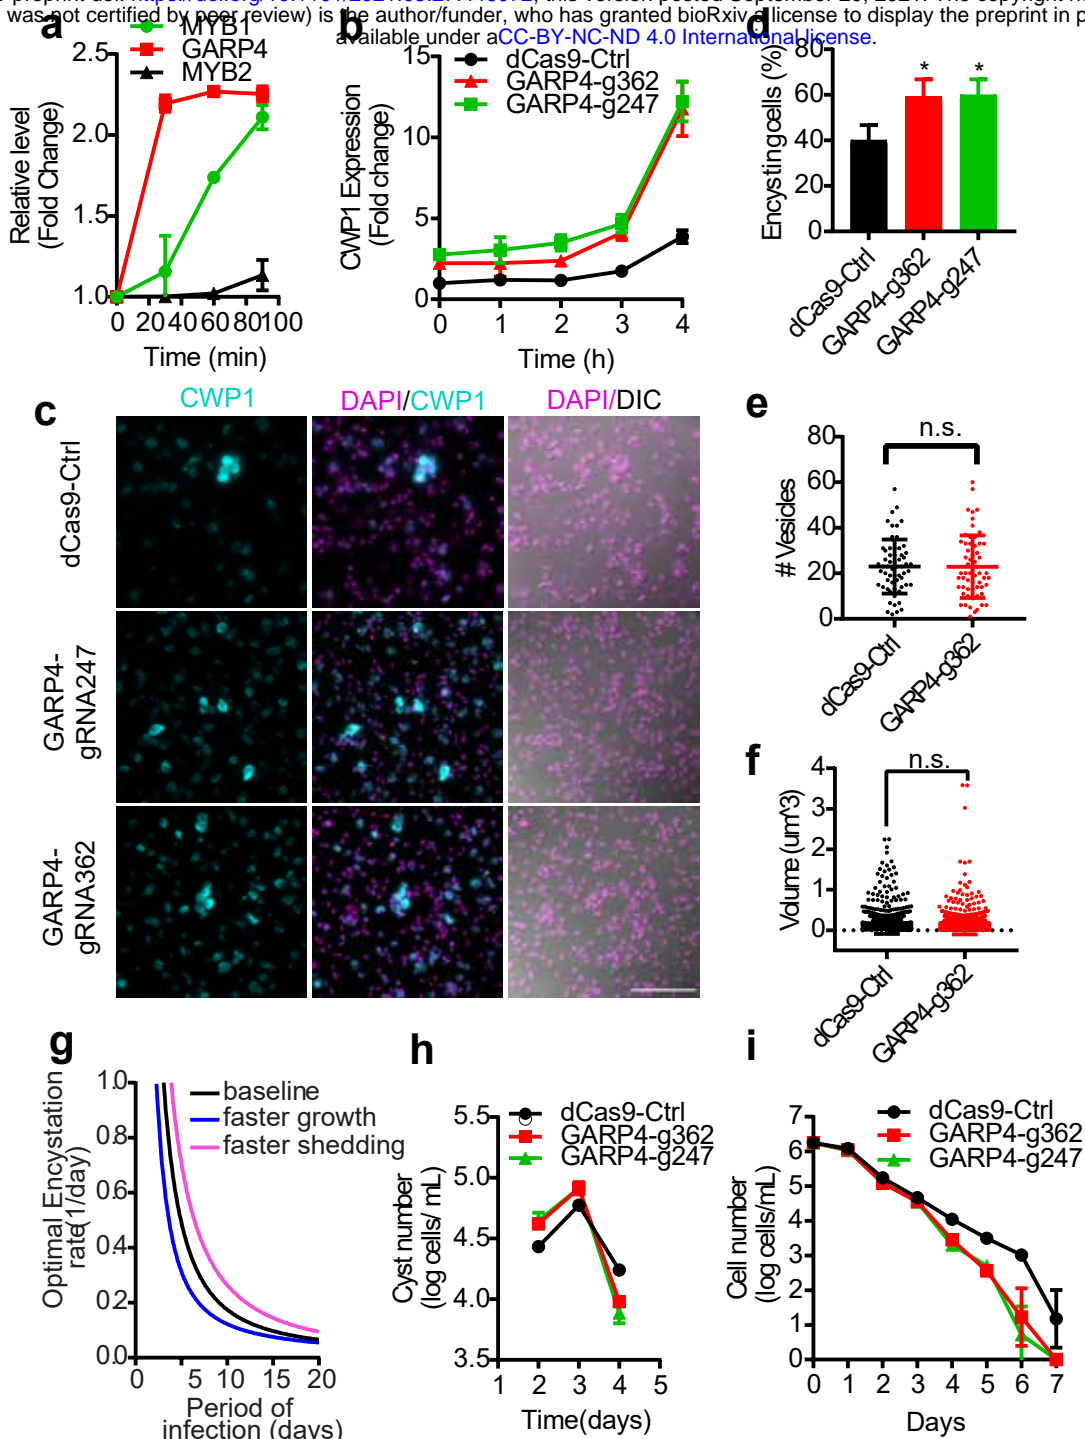

Figure 3| GARP4 regulates encystation rates. **a**, Relative protein levels of MYB1-NLuc, MYB2-NLuc, and GARP4-NLuc after 0, 0.5, 1 and 2 h exposure to encystation medium (Uppsala medium). The expression level from each time point has three biological replicates. The fold change is normalized to 0 h. **b**, Relative expression of CWP1-NLuc in GARP4 knockdowns after 0, 0.5, 1, 2, 3 and 4 h exposure to encystation medium (Uppsala medium). The expression level from each time point has three biological replicates. The fold change is normalized to 0 h dCas9-Ctrl. **c**, CWP1 and DAPI staining at 24 h of encystation for dCas9-Ctrl, GARP4-gRNA247 and GARP4-gRNA362 cell lines. Bars, 100  $\mu\text{m}$ . **d**, Quantification of encysting cells at 24 h post induction of encystation for dCas9-Ctrl, GARP4-gRNA247 and GARP4-gRNA362 cell lines as determined by CWP1 expression. Data are mean  $\pm$  s.d. from three independent experiments (total cells counted for dCas9-Ctrl n=1830, GARP4-g362 n=1747, GARP4-g247 n=1783) Student's t-test, \*p<0.01. **e**, IMARIS-assisted analysis of vesicle number in 4 h encysting cells of dCas9-Ctrl, GARP4-gRNA247 and GARP4-gRNA362 cell lines. **f**, IMARIS-assisted analysis of vesicle volume of 4 h encysting cells of dCas9-Ctrl, GARP4-gRNA247 and GARP4-gRNA362 cell lines. n.s.= not significant. n=63 cells for dCas9-Ctrl. n= 93 for GARP4-g362. **g**, Using our dynamical model, we numerically determine the optimal encystation rate as a function of the period of infection for a baseline set of parameters (specifically,  $\gamma = 0.363 \text{ day}^{-1}$ ,  $\lambda = 0.1 \text{ day}^{-1}$ ,  $T_0 = 1 \text{ cell}$ , and  $C_0 = 0 \text{ cells}$ ; see Methods). The result is the thick black curve. We then repeat the analysis but increase the rate of trophozoite growth ( $\gamma = 0.762 \text{ day}^{-1}$ ) or increase the rate of shedding ( $\lambda = 0.25 \text{ day}^{-1}$ ), which yields the blue and red curves, respectively. **h**, Quantification of cyst number in GARP4 knockdown from daily supplement of fresh encystation medium (removed detached cells and cysts). **i**, Quantification of trophozoite number in GARP4 knockdown from daily supplement of fresh encystation medium.

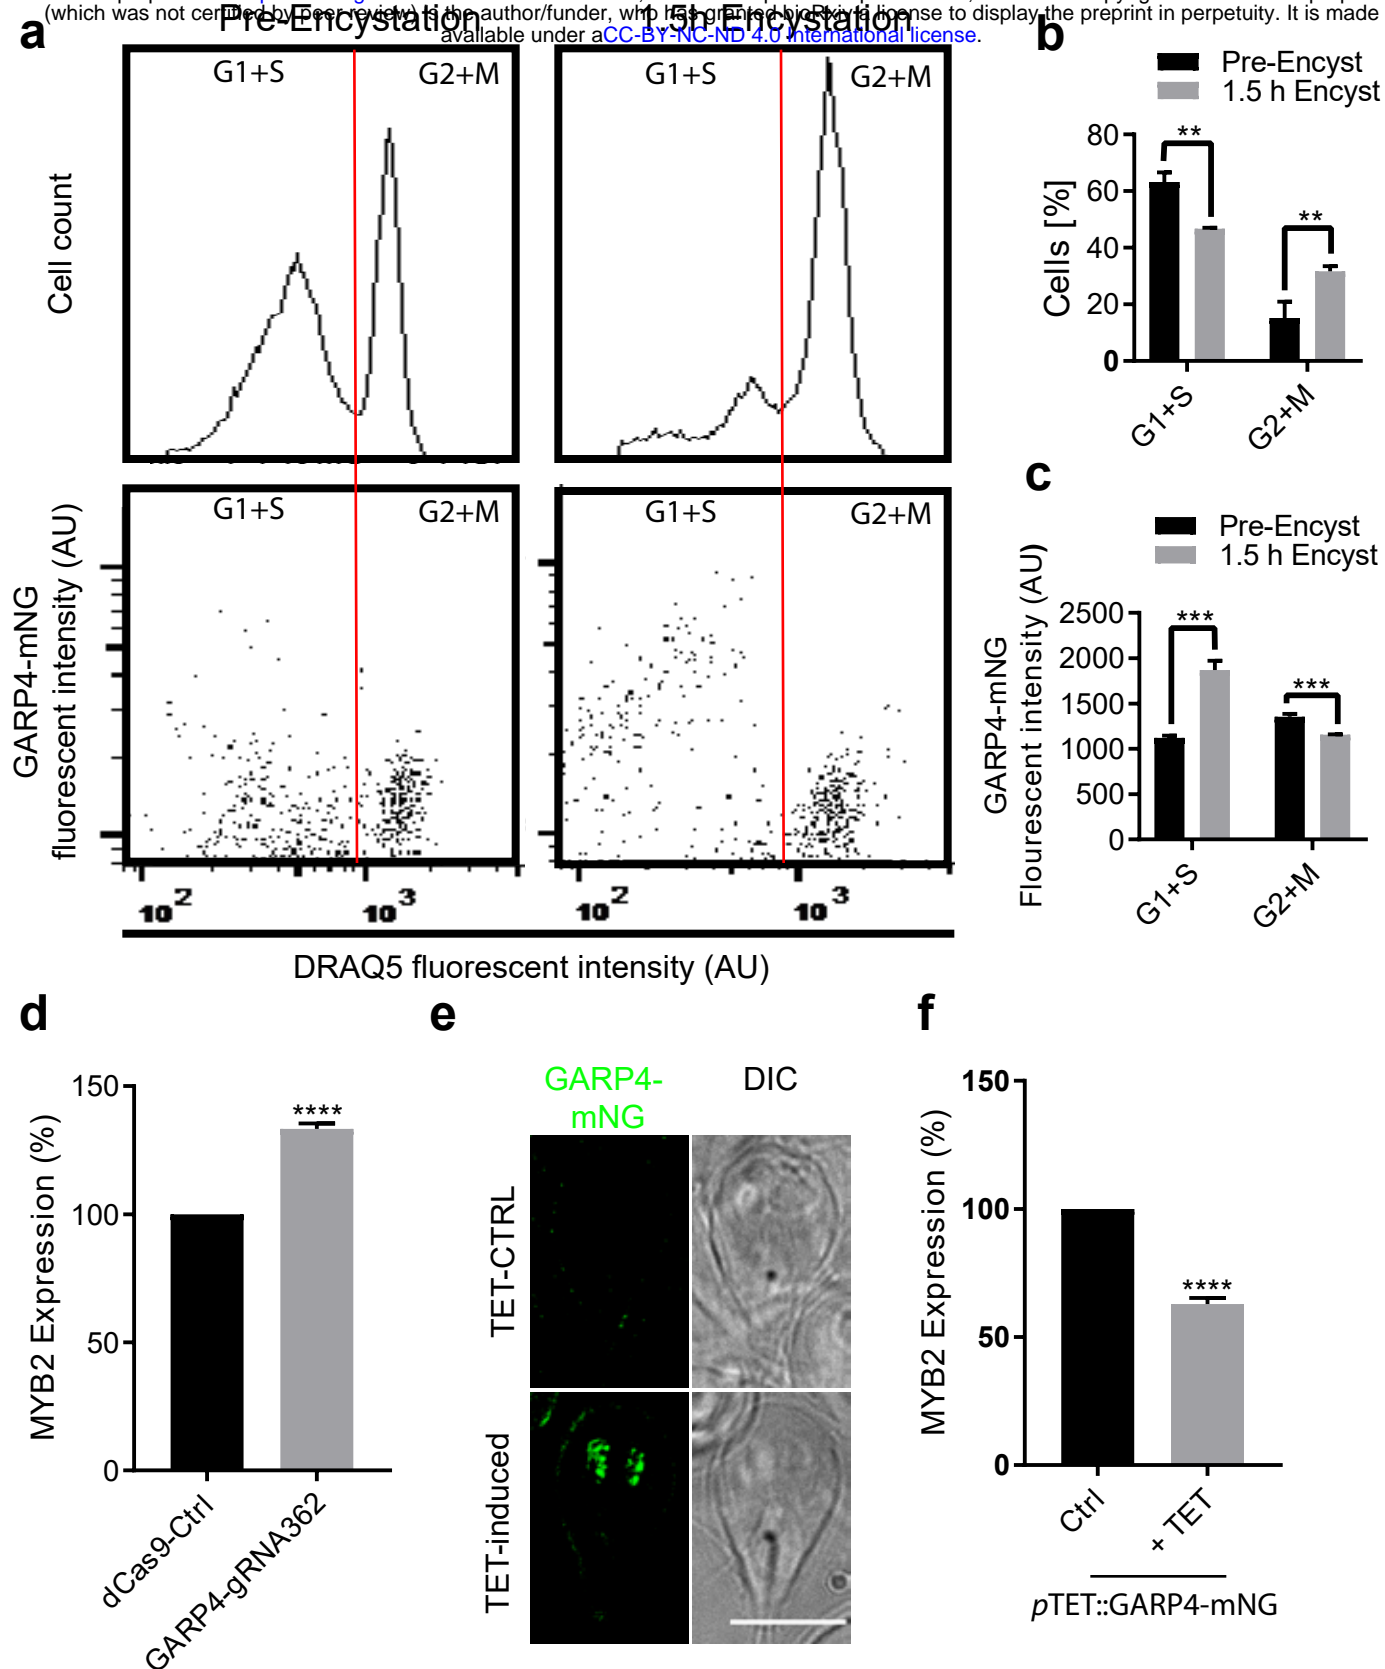

Figure 4 | GARP4 is part of the restriction point that prevents G1 cells from encysting. a, Flow cytometry analysis of DRAQ5 and GARP4-mNG at 0 and 1.5 h of encystation. Red line is the separation point between G1/S and G2/M phases. b, Quantification of G1/S and G2/M cells from 0 and 1.5 h encystation. Data are mean  $\pm$  s.d. (n=3, 10,000 cells per replicate) Student's t-test, \*\* $p < 0.001$ . c, Quantification of GARP4-mNG fluorescence intensity for G1/S and G2/M cells at 0 and 1.5 h of encystation. Data are mean  $\pm$  s.d. (n=3) Student's t-test, \*\*\*\* $p < 0.0001$ . d, Quantification of relative expressions of MYB2 from dCas9 control and GARP4-gRNA362 cell lines. \*\*\*\* $p < 0.00001$ . e, Fluorescent imaging of pTET::GARP4-mNG with and without tetracycline induction. Bars, 10  $\mu$ m. f, Quantification of relative expressions of MYB2 after 4 h of encystation from tetracycline-induced GARP4-mNG overexpression cell lines. \*\*\*\* $p < 0.00001$ .
